# Supplementary material
Source: publisher site journal article supplement (https://www.spandidos-publications.com/5119/downloadSupplementary)
Supplement: Supplementary file 1 [file downloadSupplementary]

## Sheet: Table S22
Table SXXII. The correlation between DNase gene expression levels in the 60 human cancer cell lines (NCI-60) with drug sensitivity of over 200 chemotherapy drugs.
Gene	Drug	Correlation value	P-value
DNASE1L2	Hydroxyurea	0.690958	9.9462e-10
DNASE2B	Vemurafenib	0.542674	7.48859e-06
DNASE1L2	Uracil mustard	0.516759	2.36782e-05
DNASE1L2	Chlorambucil	0.516083	2.437e-05
DNASE1L2	Triethylenemelamine	0.510249	3.1163e-05
DNASE1L2	Pipobroman	0.505292	3.82707e-05
DNASE1L2	Thiotepa	0.501662	4.43935e-05
DNASE1L2	Chelerythrine	0.500326	4.68665e-05
DNASE2B	Hypothemycin	0.489864	7.1101e-05
DNASE1L2	8-Chloro-adenosine	0.465694	0.000177135
DNASE1L2	RH1	0.463495	0.000191829
DNASE1L2	Imexon	0.460212	0.000215863
DNASE1L2	Melphalan	0.458187	0.000232022
DNASE1L2	Idarubicin	0.448691	0.000323605
DNASE1L3	Isotretinoin	0.446006	0.000354901
DNASE2	Dasatinib	-0.438818	0.000452738
DNASE1L2	Cyclophosphamide	0.437597	0.000471601
DNASE2B	Dabrafenib	0.437484	0.000473373
DNASE2B	Docetaxel	-0.435852	0.0004998
DNASE2B	Denileukin Diftitox Ontak	0.427514	0.000656854
DNASE1L3	Oxaliplatin	0.417397	0.000906714
DNASE1L3	Imiquimod	0.417285	0.0009099
DNASE1L2	Cytarabine	0.411193	0.00109948
DNASE1L3	Megestrol acetate	0.405967	0.00128968
DNASE1L2	Fludarabine	0.405928	0.00129121
DNASE1L2	Gemcitabine	0.404127	0.00136342
DNASE1L3	Fluphenazine	0.400071	0.0015394
DNASE1L2	Fenretinide	0.393916	0.00184552
DNASE1L3	Entinostat	0.393106	0.00188961
DNASE1L2	Cladribine	0.389443	0.00210103
DNASE1L2	Carboplatin	0.388859	0.00213662
DNASE1L2	Lomustine	0.388307	0.00217073
DNASE1L1	Rapamycin	0.382643	0.00255015
DNASE1L2	Fostamatinib	0.382161	0.00258503
DNASE1L2	Nitrogen mustard	0.378153	0.00289171
DNASE1L3	Denileukin Diftitox Ontak	0.378004	0.00290372
DNASE1L2	5-fluoro deoxy uridine 10mer	0.374421	0.00320598
DNASE1L2	Asparaginase	0.370539	0.00356469
DNASE1L2	Cisplatin	0.370229	0.00359482
DNASE1L2	Carmustine	0.369329	0.00368347
DNASE2B	Bafetinib	0.366728	0.00395097
DNASE2B	Selumetinib	0.366707	0.00395319
DNASE1L2	Decitabine	0.359678	0.00476395
DNASE1L2	kahalide f	-0.358278	0.00494196
DNASE1L2	Cordycepin	0.35359	0.00558116
DNASE1	Triciribine phosphate	0.352775	0.00569937
DNASE2	Amonafide	-0.352162	0.00578981
DNASE1L2	tfdu	0.350622	0.0060224
DNASE1L3	Epirubicin	0.348896	0.00629292
DNASE1L2	Nelarabine	0.346636	0.00666318
DNASE1L2	Ixabepilone	0.342462	0.00739717
DNASE1L2	Etoposide	0.340887	0.00769207
DNASE1L1	Oxaliplatin	-0.340823	0.00770426
DNASE1L3	Elesclomol	0.340637	0.00773966
DNASE1L3	Dasatinib	-0.339796	0.00790208
DNASE1L2	XK-469	0.338552	0.00814786
DNASE1L2	LMP-400	0.333133	0.00929768
DNASE1L2	Raltitrexed	0.3326	0.00941811
DNASE2	Pralatrexate	-0.329093	0.0102443
DNASE1L2	Parthenolide	0.327001	0.0107666
DNASE2B	Fostamatinib	-0.326423	0.0109149
DNASE1L2	Methotrexate	0.325942	0.0110396
DNASE2	Hydrastinine HCl	0.325676	0.0111091
DNASE1L2	Benzimate	0.325586	0.0111327
DNASE1L1	XL-147	0.324546	0.0114086
DNASE1L3	Valrubicin	0.324366	0.011457
DNASE1	Lapachone	-0.323687	0.011641
DNASE1L2	Digoxin	0.318967	0.0129918
DNASE1L1	Chelerythrine	-0.318137	0.0132428
DNASE1L2	Irinotecan	0.317172	0.0135399
DNASE1L2	Dexrazoxane	0.315251	0.0141485
DNASE1L3	Etoposide	0.314703	0.0143264
DNASE2	Panobinostat	-0.314465	0.0144041
DNASE1L1	Vemurafenib	0.311381	0.0154461
DNASE1L1	Imexon	-0.309305	0.016183
DNASE1L2	Ifosfamide	0.308218	0.0165809
DNASE1L3	XL-147	0.308112	0.01662
DNASE1L2	Nelfinavir	0.304735	0.0179126
DNASE1	Nelarabine	0.304167	0.0181381
DNASE1L1	Palbociclib	-0.30301	0.0186049
DNASE2B	Pyrazoloacridine	-0.303006	0.0186067
DNASE1L1	3-Bromopyruvate (acid)	-0.302068	0.0189927
DNASE2	AT-13387	-0.301058	0.0194163
DNASE2	Bosutinib	-0.301008	0.0194373
DNASE1L1	Temsirolimus	0.299845	0.0199351
DNASE1L2	Perifosine	0.299266	0.0201872
DNASE2	Batracylin	-0.29889	0.020352
DNASE1L1	Carfilzomib	-0.298398	0.0205695
DNASE2B	PD-98059	0.297029	0.0211856
DNASE1L1	LY-294002	0.29681	0.0212859
DNASE1L2	Oxaliplatin	0.296185	0.0215735
DNASE1L2	Karenitecin	0.293727	0.0227361
DNASE1L2	7-Ethyl-10-hydroxycamptothecin	0.293453	0.0228689
DNASE1L3	Bosutinib	-0.292938	0.0231207
DNASE1	Wortmannin	0.291788	0.0236907
DNASE2B	Cobimetinib (isomer 1)	0.291147	0.0240135
DNASE1L3	Irofulven	-0.290062	0.0245684
DNASE1L2	Topotecan	0.289817	0.0246957
DNASE1L2	LMP776	0.28958	0.0248186
DNASE1L1	By-Product of CUDC-305	-0.287319	0.0260202
DNASE1	Lapatinib	0.285794	0.0268582
DNASE1L2	Vorinostat	0.285391	0.0270831
DNASE1L1	Ifosfamide	-0.284476	0.0276004
DNASE1L2	Triapine	0.28402	0.0278613
DNASE1L2	Dasatinib	-0.28345	0.0281897
DNASE1	Fulvestrant	0.280206	0.0301245
DNASE1L1	Wortmannin	0.280054	0.0302174
DNASE2	Docetaxel	-0.279171	0.030764
DNASE1L2	Raloxifene	0.278506	0.0311815
DNASE1L1	Dabrafenib	0.277007	0.0321391
DNASE2	Asparaginase	-0.277004	0.0321411
DNASE1	Everolimus	0.276787	0.0322822
DNASE2	6-Mercaptopurine	-0.27504	0.0334331
DNASE1L2	Batracylin	0.274511	0.0337884
DNASE1	Rapamycin	0.274081	0.0340798
DNASE2B	Benzimate	-0.272997	0.034823
DNASE2B	Mitoxantrone	-0.272504	0.0351651
DNASE2B	Lapachone	0.272075	0.0354658
DNASE1L1	kahalide f	0.271714	0.0357197
DNASE2	Pyrazoloacridine	-0.270893	0.0363038
DNASE1L2	Teniposide	0.269155	0.0375664
DNASE1L3	Raltitrexed	0.269092	0.0376128
DNASE2B	Paclitaxel	-0.268572	0.0379983
DNASE1L2	Trametinib	-0.267837	0.0385479
DNASE1L2	Pemetrexed	0.267706	0.0386468
DNASE1L2	Isotretinoin	0.267354	0.0389128
DNASE1L2	By-Product of CUDC-305	0.265619	0.0402473
DNASE2B	Obatoclax	-0.265507	0.0403351
DNASE2B	8-Chloro-adenosine	-0.263765	0.041715
DNASE1L3	Afatinib	-0.260978	0.0440037
DNASE1L2	Amonafide	0.259394	0.0453505
DNASE2	RH1	-0.258836	0.0458329
DNASE1L3	Dromostanolone Propionate	0.25837	0.0462386
DNASE2	By-Product of CUDC-305	-0.256096	0.0482615
DNASE1L3	Teniposide	0.255831	0.0485024
DNASE1L2	Clofarabine	0.255681	0.0486388
DNASE2B	O-6-Benzylguanine	-0.255321	0.0489677
DNASE1L2	Dimethylaminoparthenolide	0.255247	0.0490359
DNASE1L2	Lapachone	0.254638	0.0495973
DNASE1L2	Cobimetinib (isomer 1)	-0.254345	0.0498688
